# Supplementary material for: Ga2O3–Li3VO4/NC nanofibers toward superb high-capacity and high-rate Li-ion storage
Source: Royal Society of Chemistry journal article supplement (doi:10.1039/d1nj04821j), 2021-11-29
Supplement: d1nj04821j1.pdf [file d1nj04821j1.pdf]

## Ga<sub>2</sub>O<sub>3</sub>-Li<sub>3</sub>VO<sub>4</sub>/NC nanofibers toward superb high-capacity and high-rate Li-ion storage

Daobo Li,<sup>a</sup> Zhen Xu,<sup>a</sup> Dongmei Zhang,<sup>\*a</sup> Cunyuan Pei,<sup>a</sup> Tao Li,<sup>\*b</sup> Ting Xiao,<sup>c</sup> and Shibing Ni<sup>\*a</sup>

<sup>a</sup>College of Materials and Chemical Engineering, Key Laboratory of Inorganic Nonmetallic Crystalline and Energy Conversion Materials, China Three Gorges University, Yichang, 443002, China.

<sup>b</sup>Analysis and Testing Center, China Three Gorges University, Yichang, 443002, China.

<sup>c</sup>College of Electrical Engineering & New Energy, China Three Gorges University, Yichang, 443002, China.

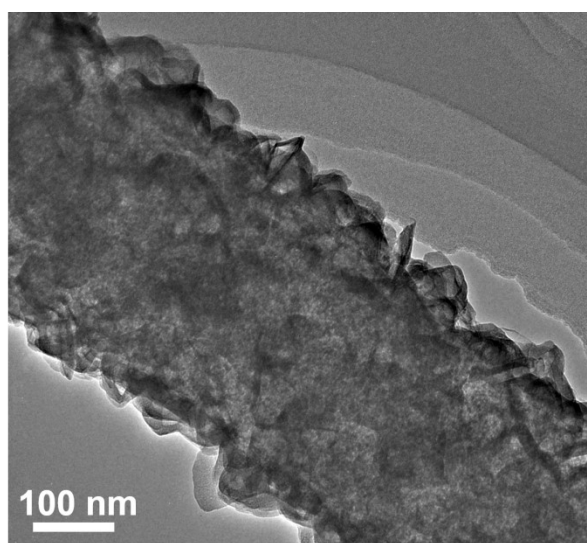

Fig. S1. Low magnification TEM image of the G-LVO/NC NFs.

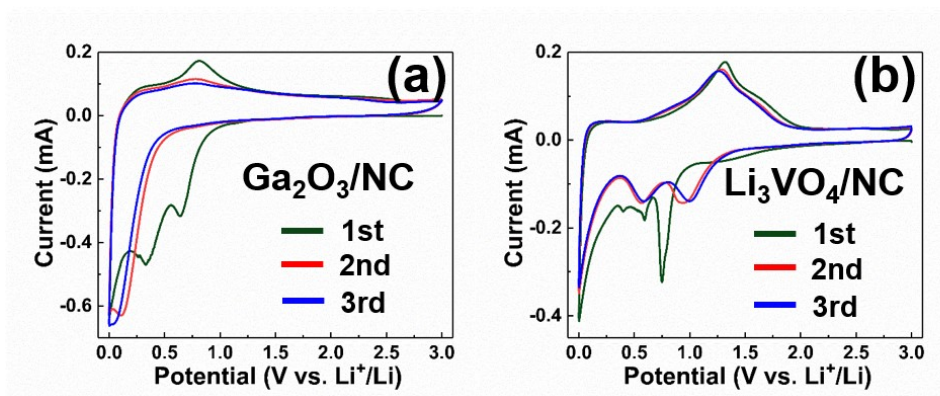

Fig. S2. CV curves of (a) the Ga<sub>2</sub>O<sub>3</sub>/NC and (b) Li<sub>3</sub>VO<sub>4</sub>/NC electrodes.

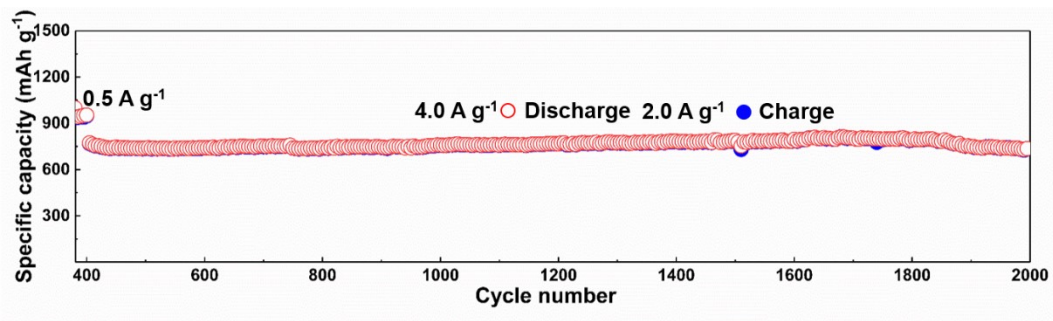

Fig. S3. Cycling performance of the G-LVO/NC NFs electrode after rate performance testing.

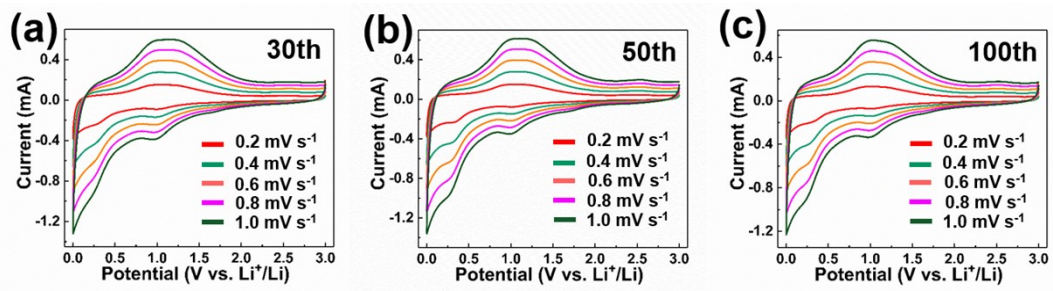

Fig. S4. CV curves with varied scan rates of the G-LVO/NC NFs electrode after (a) the 30, (b) 50 and (c) 100 cycles.

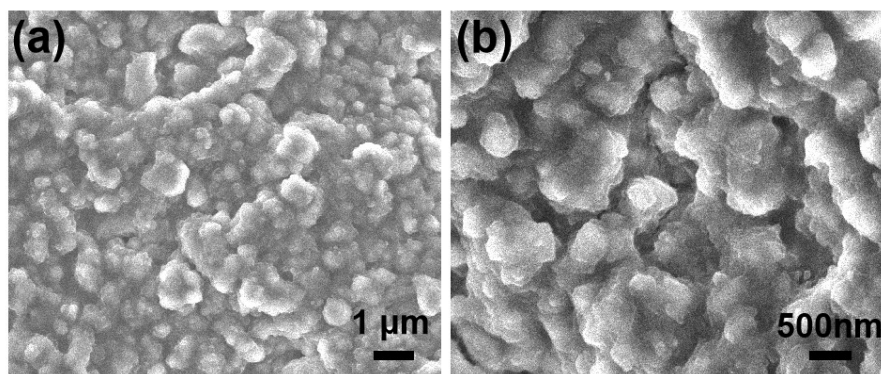

Fig. S5. (a) Low and (b) high magnification SEM image of the G-LVO/NC NFs electrode after 1000 cycles.
